# Supplementary material for: A systematic approach to offshore wind turbine jacket predesign and optimization: geometry, cost, and surrogate structural code check models
Source: Copernicus journal article supplement (doi:10.5194/wes-3-553-2018), 2018-08-23
Supplement: Supplementary file 1 [file wes-3-553-2018-supplement.zip]

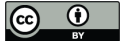

## *Supplement of*

# **A systematic approach to offshore wind turbine jacket predesign and optimization: geometry, cost, and surrogate structural code check models**

**Jan Häfele et al.**

*Correspondence to:* Jan Häfele ([j.haeefe@isd.uni-hannover.de](mailto:j.haeefe@isd.uni-hannover.de))

- [wes-3-553-2018-supplement-title-page.pdf](#)
- [samples\\_train.txt](#)
- [samples\\_val.txt](#)

The copyright of individual parts of the supplement might differ from the CC BY 4.0 License.
